# Supplementary material for: L1CAM further stratifies endometrial carcinoma patients with no specific molecular risk profile
Source: PubMed Central journal article supplement (PMC6134076; doi:10.1038/s41416-018-0187-6), 2018-07-27
Supplement: 41416_2018_187_MOESM1_ESM.pdf [file 41416_2018_187_MOESM1_ESM.pdf]

**Supplementary Figure 1** L1CAM expression in tumour cells (a) score 0 = 0%, (b) score 1 = 1-10%, (c) score 2 and 3 =  $\geq$  10%

(a) Score 0 (no staining)

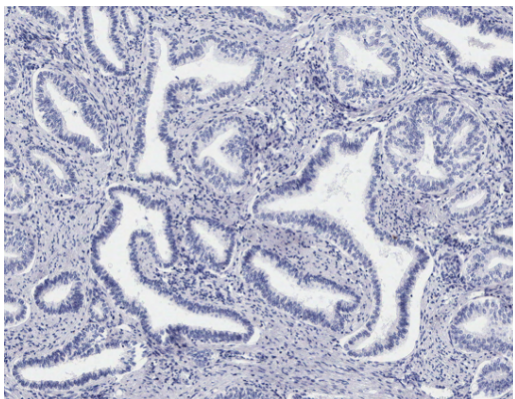

(b) Score 1 (1-10%)

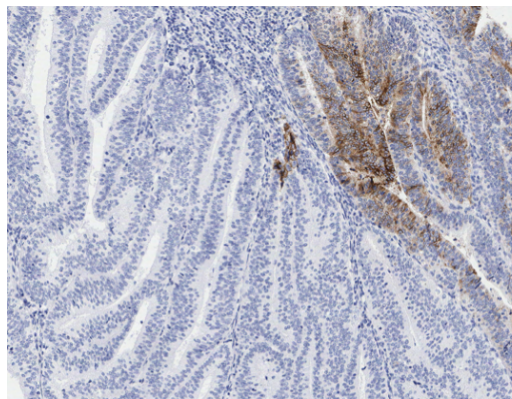

(c) Score 2 and 3 ( $\geq$ 10%)

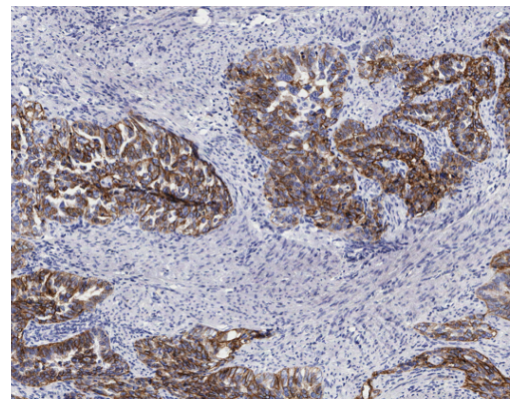

L1CAM  
(CD 171)
