# Supplementary material for: L1CAM further stratifies endometrial carcinoma patients with no specific molecular risk profile
Source: PubMed Central journal article supplement (PMC6134076; doi:10.1038/s41416-018-0187-6), 2018-07-27
Supplement: 41416_2018_187_MOESM2_ESM.pdf [file 41416_2018_187_MOESM2_ESM.pdf]

**Supplementary Table 1** Correlation of clinicopathological data and L1CAM in the p53 wt/NSMP ProMisE subgroup.

|                                       | <b>Total</b>       | <b>L1CAM negative</b> | <b>L1CAM positive</b> | <b>P-Value</b> |
|---------------------------------------|--------------------|-----------------------|-----------------------|----------------|
| <b>Number of Patients</b>             | 228 (100%)         | 209 (91.6%)           | 19 (8.4%)             |                |
| <b>Clinicopathological Parameters</b> |                    |                       |                       |                |
| <b>Age at diagnosis (yrs)</b>         |                    |                       |                       |                |
| Mean ( $\pm$ sd)                      | 63.2 ( $\pm$ 12.4) | 62.9 ( $\pm$ 12.2)    | 67.0 ( $\pm$ 13.9)    | <0.001         |
| Median                                | 63.4               | 63.0                  | 67.7                  |                |
| <b>Stage (FIGO 2009)</b>              |                    |                       |                       |                |
| I                                     | 198 (86.8%)        | 185 (88.5%)           | 13 (68.4%)            | 0.03           |
| II-IV                                 | 30 (13.2%)         | 24 (11.5%)            | 6 (31.6%)             |                |
| <b>Tumour grade</b>                   |                    |                       |                       |                |
| Grade 1 and 2                         | 211 (92.5%)        | 198 (94.7%)           | 13 (68.4%)            | <0.001         |
| Grade 3                               | 17 (7.5%)          | 11 (5.3%)             | 6 (31.6%)             |                |
| <b>LVSI</b>                           |                    |                       |                       |                |
| negative                              | 213 (93.4%)        | 196 (93.7%)           | 17 (89.5%)            | 0.4            |
| positive                              | 15 (6.6%)          | 13 (6.3%)             | 2 (10.5%)             |                |
| <b>Histology</b>                      |                    |                       |                       |                |
| Endometrioid                          | 226 (99.1%)        | 208 (99.5%)           | 18 (94.7%)            | 0.5            |
| Non-Endometrioid                      | 2 (0.9%)           | 1 (0.5%)              | 1 (5.3%)              |                |
